# Supplementary material for: Regulating luminescence thermal quenching based on the synergistic effect of energy transfer and energy gap modulation
Source: Royal Society of Chemistry journal article supplement (doi:10.1039/d3dt03112h), 2024-01-01
Supplement: d3dt03112h1.pdf [file d3dt03112h1.pdf]

# Supporting Information

## **Regulating luminescence thermal quenching based on the synergistic effect of energy transfer and energy gap modulation**

Qincan Ma, Fuhua Gao, Da Cai, and Yueli Zhang\*

State Key Laboratory of Optoelectronic Materials and Technologies, School of materials science and Engineering, Sun Yat-Sen University, Guangzhou, Guangdong 510275, China.

*\*Corresponding author: Yueli Zhang E-mail: [stszyl@mail.sysu.edu.cn](mailto:stszyl@mail.sysu.edu.cn)*

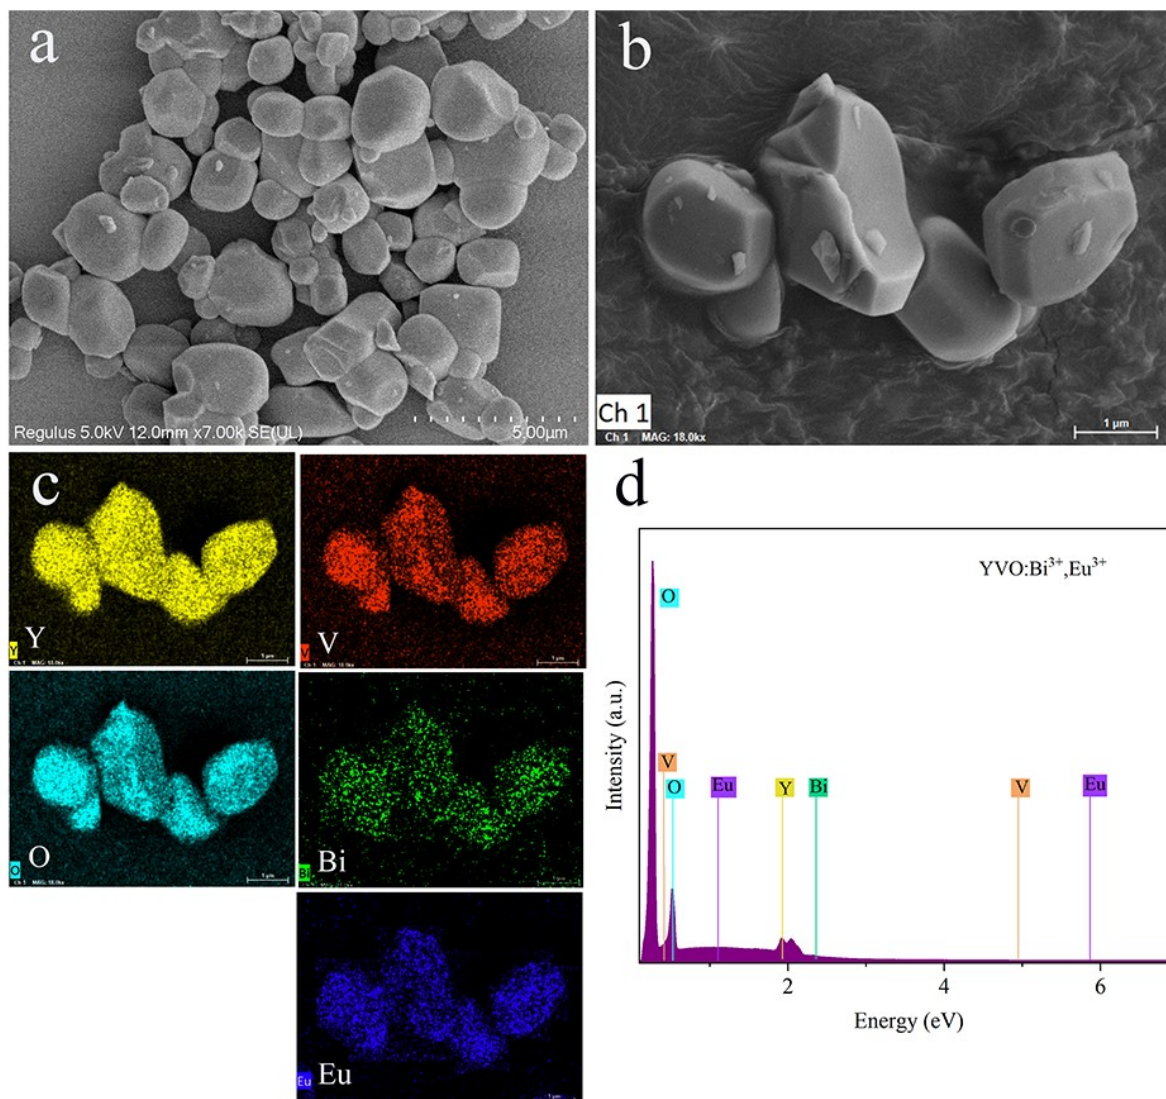

Fig. S1 (a) Typical SEM image of  $\text{YVO}_4:\text{Bi}^{3+}, \text{Eu}^{3+}$  solid solution. (b) Mapping diagram of  $\text{YVO}_4:\text{Bi}^{3+}, \text{Eu}^{3+}$  solid solution. (c) The corresponding elemental mapping analysis for the Y, V, O, Bi and Eu elements. (d) EDS spectra of  $\text{YVO}_4:\text{Bi}^{3+}, \text{Eu}^{3+}$ .

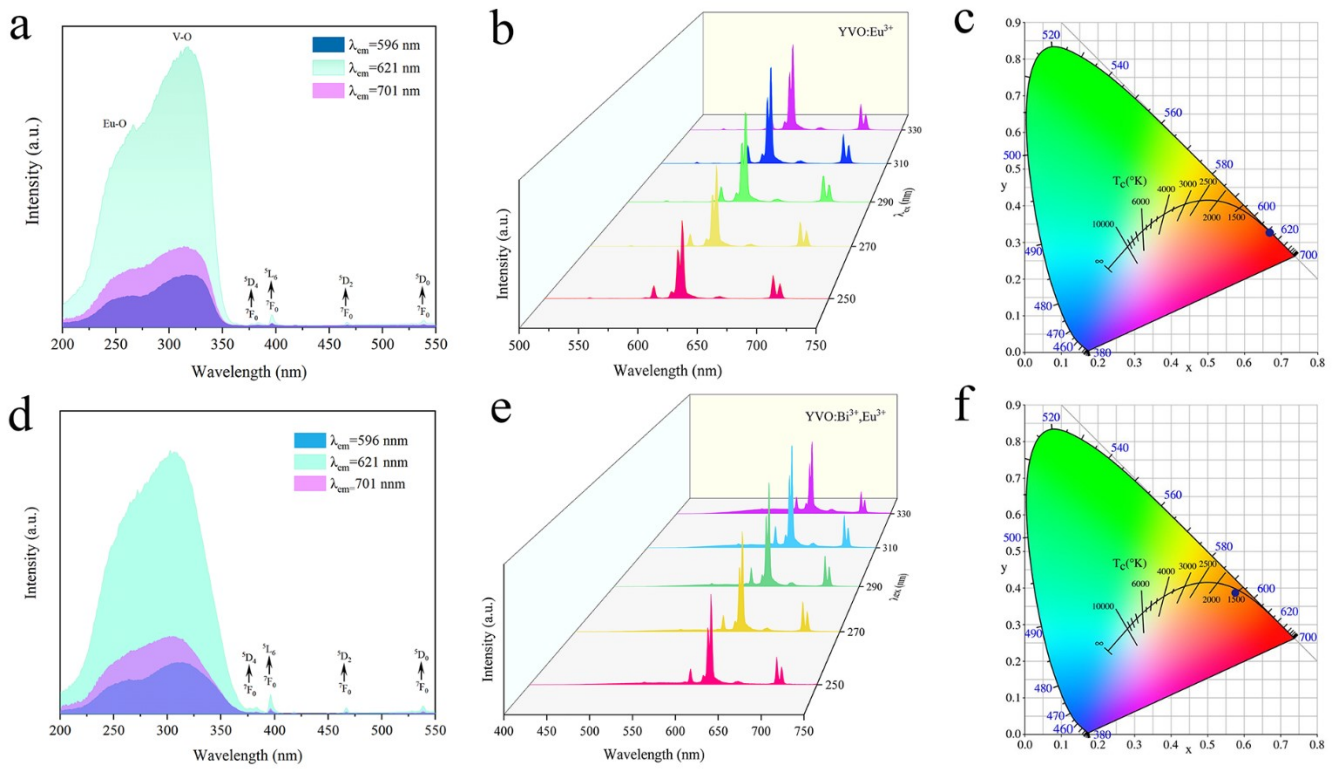

Fig. S2 (a) PLE spectra of YVO<sub>4</sub>: Eu<sup>3+</sup> ( $\lambda_{em}$  =596 nm, 621 nm, 621 nm). (b) PL spectra of YVO<sub>4</sub>: Eu<sup>3+</sup> ( $\lambda_{ex}$  =250 nm, 270 nm, 290 nm, 310 nm, 330 nm). (c) CIE chromaticity diagram ( $\lambda_{ex}$ =310 nm). (d) PLE spectra of YVO<sub>4</sub>:Bi<sup>3+</sup>, Eu<sup>3+</sup> ( $\lambda_{em}$  =596 nm, 621 nm, 621 nm). (e) PL spectra of YVO<sub>4</sub>:Bi<sup>3+</sup>, Eu<sup>3+</sup> ( $\lambda_{ex}$  =250 nm, 270 nm, 290 nm, 310 nm, 330 nm). (f) CIE chromaticity diagram ( $\lambda_{ex}$ =310 nm).

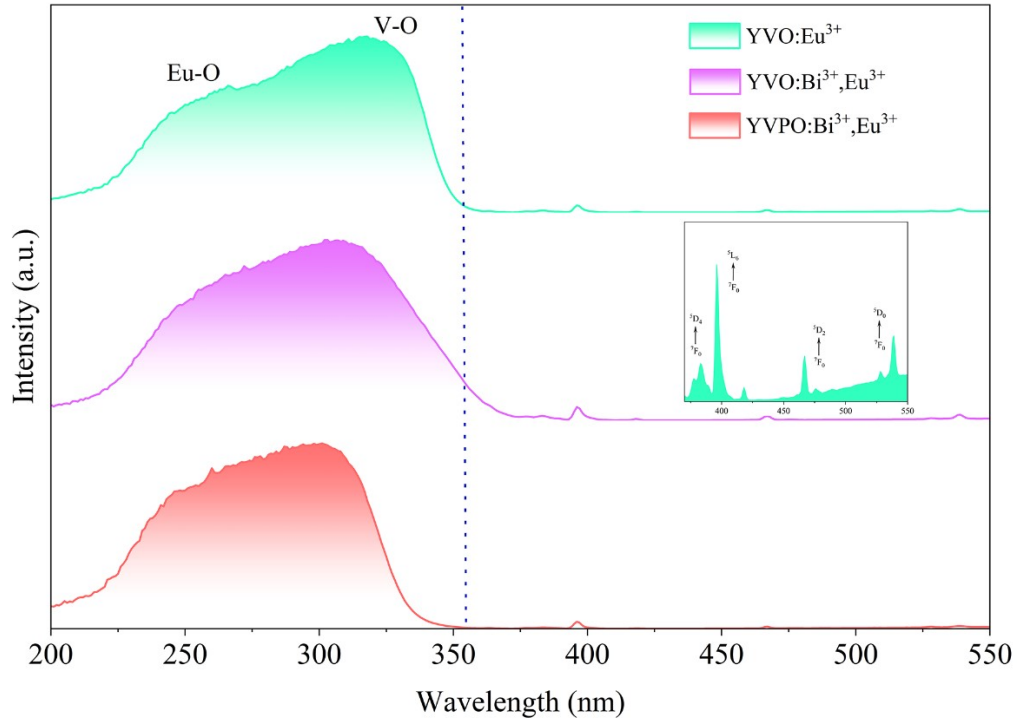

Fig. S3 PLE spectra of  $\text{YVO}_4:\text{Eu}^{3+}$ ,  $\text{YVO}_4:\text{Bi}^{3+}, \text{Eu}^{3+}$  and  $\text{YV}_{0.25}\text{P}_{0.75}\text{O}_4:\text{Bi}^{3+}, \text{Eu}^{3+}$  at  $\lambda_{\text{em}}=621\text{nm}$ .

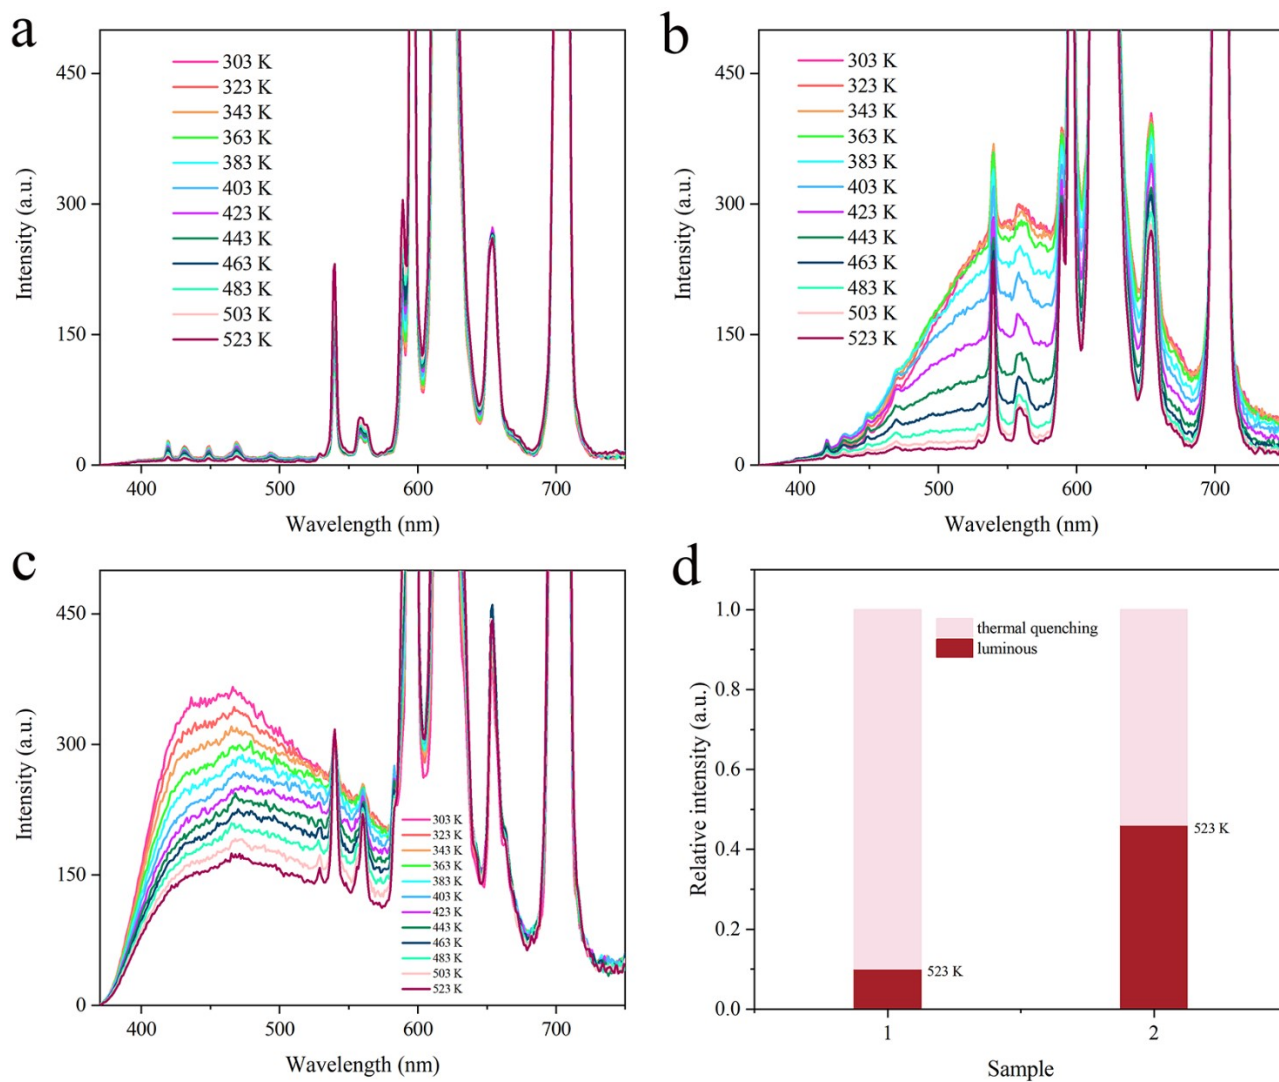

Fig. S4 PL spectra of (a)  $\text{YVO}_4:\text{Eu}^{3+}$  ( $\lambda_{\text{ex}}=320$  nm), (b) PL spectra of  $\text{YVO}_4:\text{Bi}^{3+}, \text{Eu}^{3+}$  ( $\lambda_{\text{ex}}=310$  nm), (c) PL spectra of  $\text{YV}_{0.25}\text{P}_{0.75}\text{O}_4:\text{Bi}^{3+}, \text{Eu}^{3+}$  ( $\lambda_{\text{ex}}=305$  nm) at various temperatures. (d) Relative emission intensity of  $\text{Bi}^{3+}$  at various temperature.

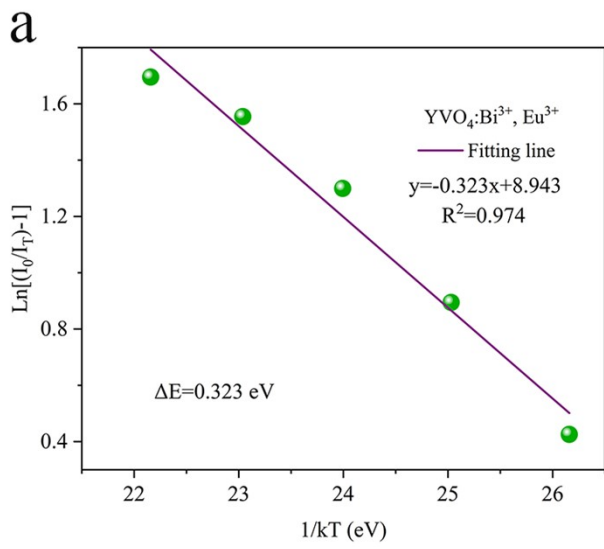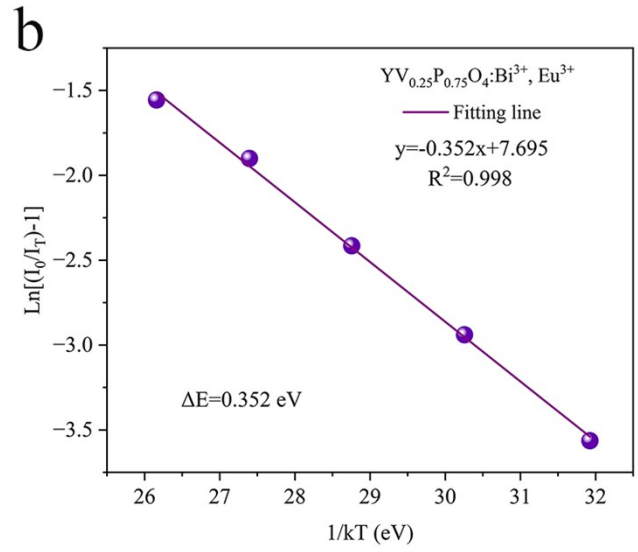

Fig. S5 Thermal quenching activation energy ( $\Delta E$ ) of (a) YVO<sub>4</sub>:Bi<sup>3+</sup>, Eu<sup>3+</sup> and (b) YV<sub>0.25</sub>P<sub>0.75</sub>O<sub>4</sub>:Bi<sup>3+</sup>, Eu<sup>3+</sup>.
